# Supplementary material for: The lamprey habenula provides an extreme example for the temporal regulation of asymmetric development
Source: Front Cell Dev Biol. 2025 Feb 6;13:1528797. doi: 10.3389/fcell.2025.1528797 (PMC11839670; doi:10.3389/fcell.2025.1528797)
Supplement: Supplementary file 4 [file Table4.xlsx]

## Sheet: Feuil1
Primary antibody		Source	Working dilution	Secondary antibody	Source	Working dilution
HuC/D	Mouse monoclonal anti-HuC/D	A-21271, Thermo Fisher Scientific Waltham, MA, USA	1/200	Alexa Fluor 488 Goat anti-Mouse antibody	A-11029, Thermo Fisher Scientific Waltham, MA, USA	1/200
PCNA	Mouse monoclonal anti-PCNA	P8825, Sigma-Aldrich, Saint-Louis, MO, USA	1/300	Alexa Fluor 488 Goat anti-Mouse antibody	A-11029, Thermo Fisher Scientific Waltham, MA, USA	1/200
Acetylated Tubulin	Mouse monoclonal Anti-Tubulin, Acetylated	T6793, Sigma-Aldrich, Saint-Louis, MO, USA	1/400	Alexa Fluor 488 Goat anti-Mouse antibody	A-11029, Thermo Fisher Scientific Waltham, MA, USA	1/200
β-Catenin	Rabbit Polyclonal Anti-β-Catenin	Ab6302, Abcam, Boston, MA, USA	1/2000	Goat anti-Rabbit IgG (H+L) HRP	656120, Thermo Fisher Scientific Waltham, MA, USA	1/200
